# Supplementary material
Source: HighWire-hosted journal article supplement (https://www.cmajopen.ca/highwire/filestream/90562/field_highwire_adjunct_files/0/open-2022-0158-1-at.pdf)

## Appendix 1: Supplementary Tables and Figures

**Table S1**

*Changes in Admission Status and Diagnoses during Pre-restrictions, Restrictions and Post-restrictions*

|                              | Pre-restrictions<br>(N=4425) | Restrictions<br>(N=1291)  | Post-restrictions<br>(N=4132) | Time difference tests |                 |
|------------------------------|------------------------------|---------------------------|-------------------------------|-----------------------|-----------------|
|                              | N (%)                        | N (%)                     | N (%)                         | X <sup>2</sup>        | p               |
| <b>Inpatient Status</b>      |                              |                           |                               | <b>48.2</b>           | <b>&lt;.001</b> |
| Involuntary                  | 2164 (48.9) <sup>a</sup>     | 745 (57.7) <sup>b</sup>   | 2277 (55.1) <sup>b</sup>      |                       |                 |
| Voluntary                    | 2261 (51.1) <sup>a</sup>     | 546 (42.3) <sup>b</sup>   | 1855 (44.9) <sup>b</sup>      |                       |                 |
| <b>Diagnosis<sup>t</sup></b> |                              |                           |                               | <b>58.7</b>           | <b>&lt;.001</b> |
| Psychotic D/O                | 1381 (31.2) <sup>a</sup>     | 502 (38.9) <sup>b</sup>   | 1454 (35.2) <sup>c</sup>      |                       |                 |
| Substance Use D/O            | 984 (22.2) <sup>a</sup>      | 265 (20.6) <sup>a,b</sup> | 812 (19.7) <sup>b</sup>       |                       |                 |
| Mood and Anxiety D/O         | 1545 (34.9) <sup>a</sup>     | 396 (30.7) <sup>b</sup>   | 1415 (34.2) <sup>a,b</sup>    |                       |                 |
| Neurocognitive D/O           | 298 (6.7) <sup>a</sup>       | 62 (4.8) <sup>b</sup>     | 212 (5.1) <sup>b</sup>        |                       |                 |
| Personality D/O              | 93 (2.1) <sup>a</sup>        | 37 (2.9) <sup>a,b</sup>   | 126 (3.0) <sup>b</sup>        |                       |                 |
| Neurodevelopmental D/O       | 78 (1.8) <sup>a</sup>        | 13 (1.0) <sup>a</sup>     | 78 (1.9) <sup>a</sup>         |                       |                 |
| Other                        | 46 (1.0) <sup>a</sup>        | 14 (1.1) <sup>a</sup>     | 35 (0.8) <sup>a</sup>         |                       |                 |

Note: Column proportions in a row not sharing superscripts are significantly different from one another.

<sup>t</sup>2 patients did not have psychiatric diagnosis.

**Table S2***Changes in Clinical Presentation during Pre-restrictions, Restrictions and Post-restrictions*

|                                      | Pre-restrictions<br>(N=4425) | Restrictions<br>(N=1291) | Post-restrictions<br>(N=4132) | Time difference tests |                 |
|--------------------------------------|------------------------------|--------------------------|-------------------------------|-----------------------|-----------------|
|                                      | M (SD)                       | M (SD)                   | M (SD)                        | F (2, 9203)           | p               |
| Clinical Rating Scales               |                              |                          |                               |                       |                 |
| Violence Sum                         | 2.3 (3.7) <sup>a</sup>       | 2.7 (3.8) <sup>b</sup>   | 2.4 (3.8) <sup>a</sup>        | <b>6.5</b>            | <b>.001</b>     |
| Aggressive Behaviour Scale           | 1.6 (2.8) <sup>a</sup>       | 1.8 (2.9) <sup>a</sup>   | 1.7 (2.9) <sup>a</sup>        | 2.3                   | .105            |
| Depression Severity Index            | 3.2 (3.5) <sup>a</sup>       | 2.7 (3.4) <sup>b</sup>   | 2.9 (3.5) <sup>b</sup>        | <b>9.2</b>            | <b>&lt;.001</b> |
| Positive Symptoms Scale—Long Version | 3.5 (4.6) <sup>a</sup>       | 4.4 (5.2) <sup>b</sup>   | 3.7 (4.6) <sup>a</sup>        | <b>18.3</b>           | <b>&lt;.001</b> |
| Social Withdrawal Scale              | 4.8 (5.1) <sup>a</sup>       | 4.0 (4.7) <sup>b</sup>   | 4.2 (4.9) <sup>b</sup>        | <b>23.9</b>           | <b>&lt;.001</b> |
| Cognitive Performance Scale          | 0.7 (1.3) <sup>a</sup>       | 0.7 (1.2) <sup>a</sup>   | 0.7 (1.2) <sup>a</sup>        | 0.5                   | .609            |

Note: Means in a row not sharing superscripts are significantly different from one another.

**Figure S1**

*Weekly Admissions during Weeks 1 through 14 for Years 2019, 2020, 2021*

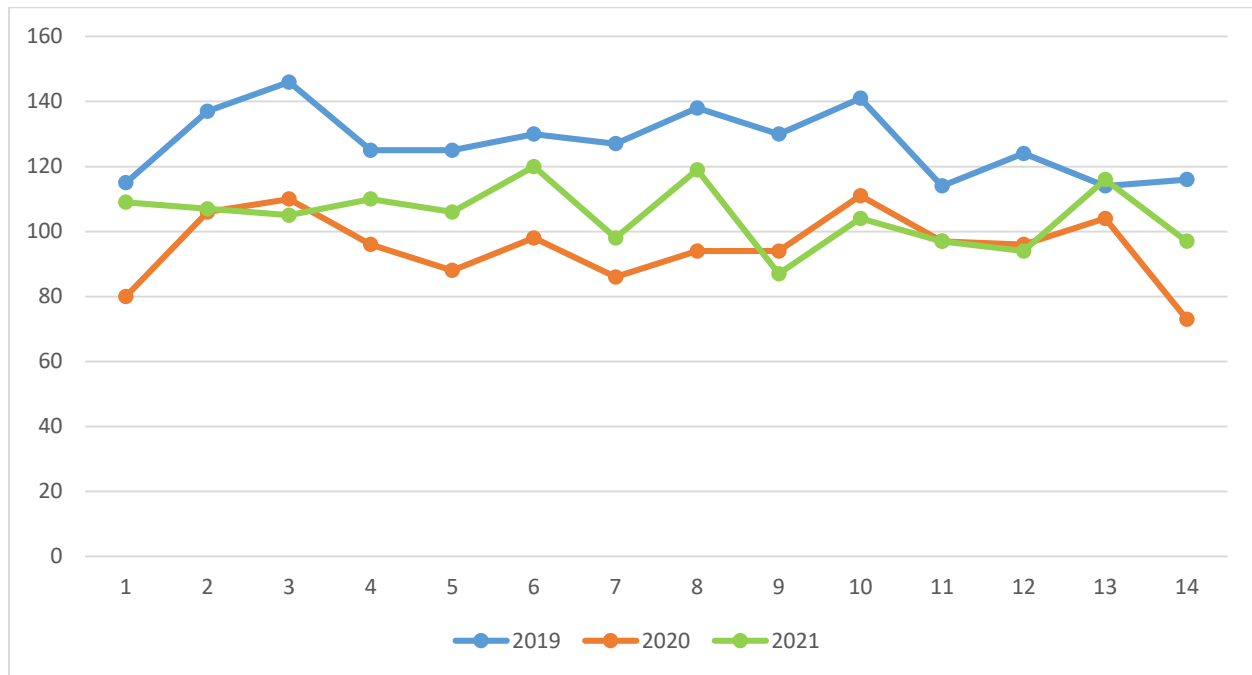

**Figure S2**

*Weekly Admissions during Weeks 15 through 25 for Years 2019, 2020, and 2021, Encompassing Pre-restrictions, Restrictions and Post-restrictions*

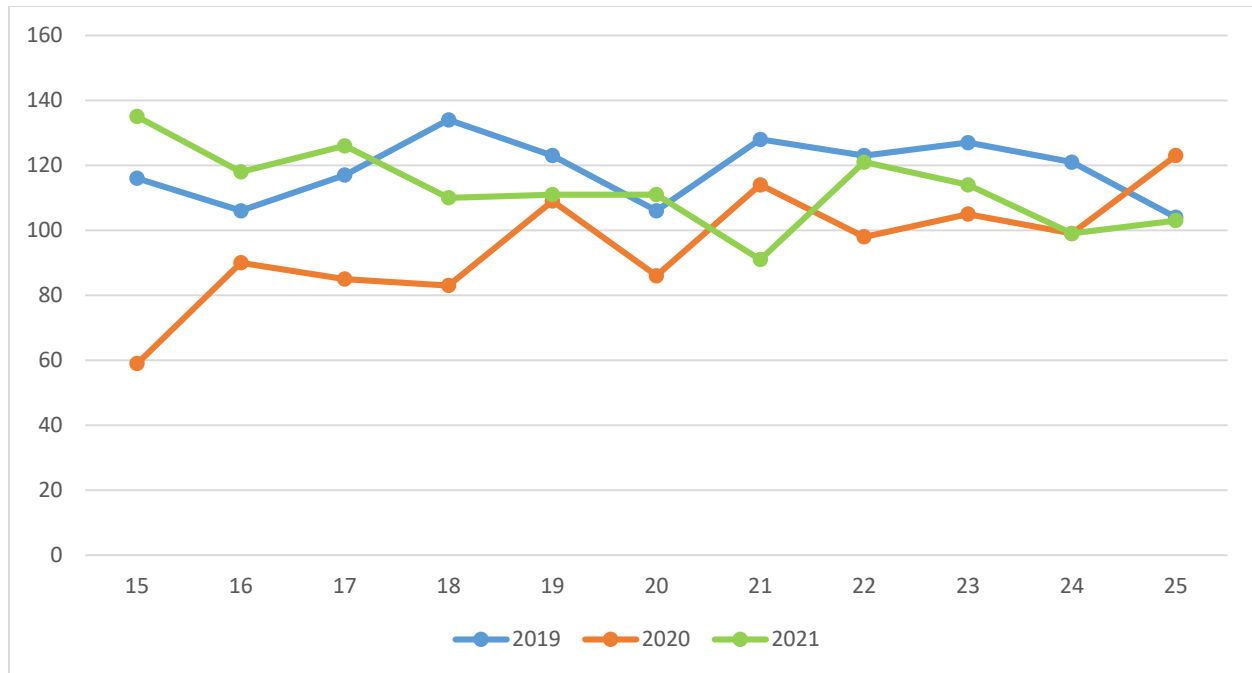

**Figure S3**

*Weekly Admissions during Weeks 26 through 52 for Years 2019, 2020, and 2021*

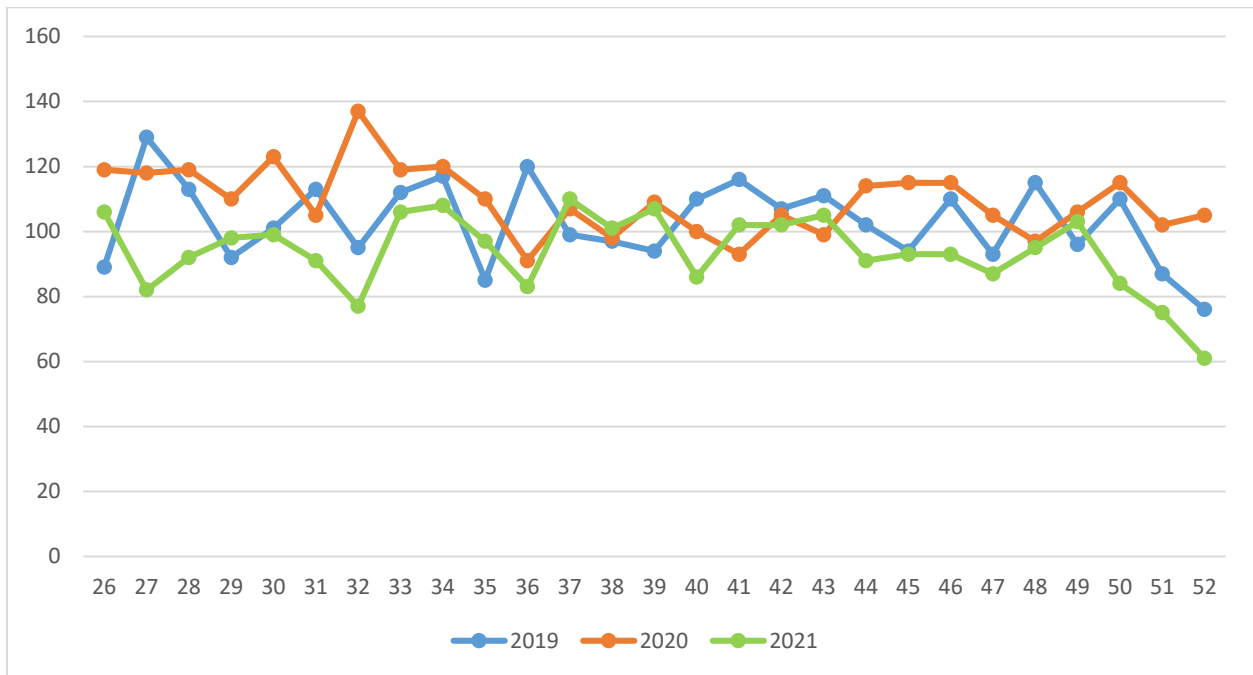

Appendix 1, as supplied by the authors. Appendix to: Ham E, Hilton NZ, Crawford J, et al. Psychiatric inpatient services in Ontario, 2019–2021: a cross-sectional comparison of admissions, diagnoses and acuity during the COVID-19 prerestriction, restriction and postrestriction periods. *CMAJ Open* 2023. DOI:10.9778/cmajo.20220158. Copyright © 2023 The Author(s) or their employer(s). To receive this resource in an accessible format, please contact us at [cmajgroup.cmaj.ca](mailto:cmajgroup.cmaj.ca).

### Figure S4

Mean Z-scores for Violence Sum Scale with 95% Confidence Intervals by Months and Years, Admissions for March, April, May and June 2019, 2020, and 2021

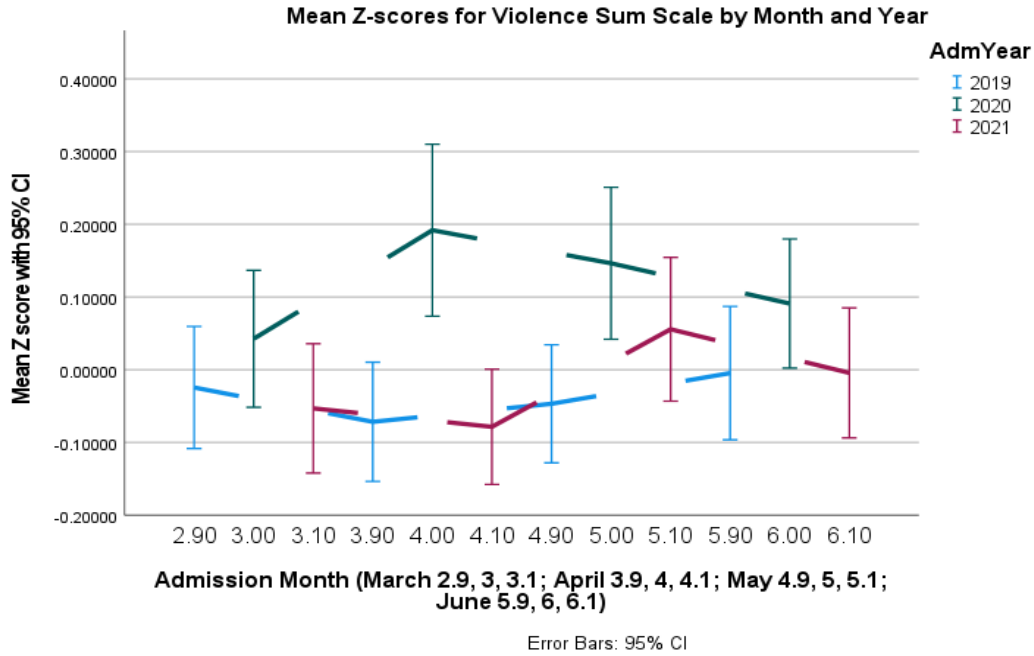

**Figure S5**

*Mean Z-scores for Aggressive Behaviour Scale with 95% Confidence Intervals by Months and Years, Admissions for March, April, May and June 2019, 2020, and 2021*

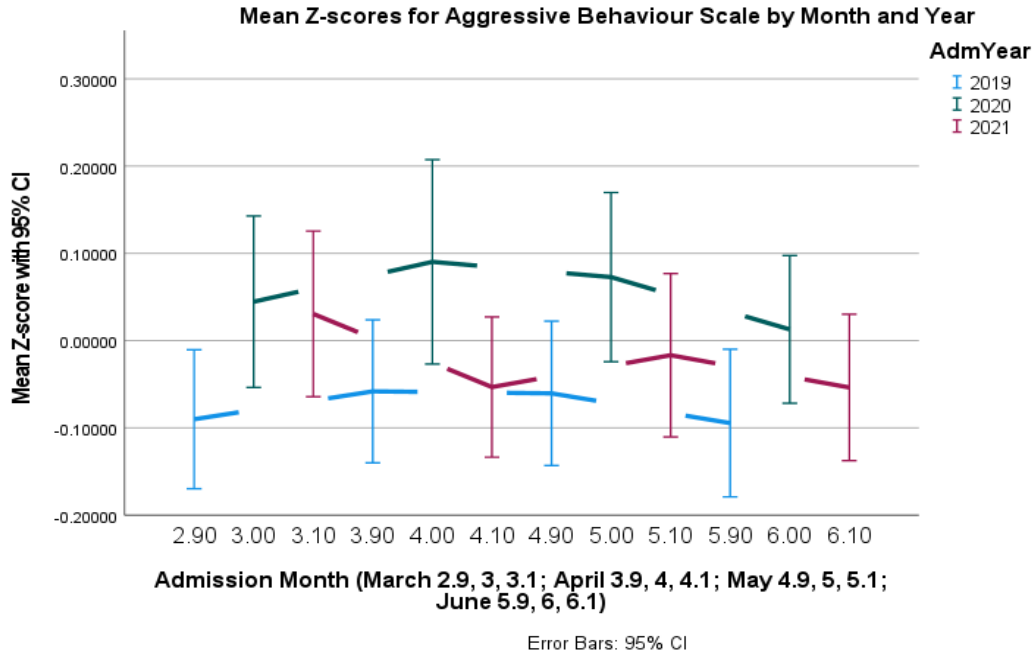

Appendix 1, as supplied by the authors. Appendix to: Ham E, Hilton NZ, Crawford J, et al. Psychiatric inpatient services in Ontario, 2019–2021: a cross-sectional comparison of admissions, diagnoses and acuity during the COVID-19 prerestriction, restriction and postrestriction periods. *CMAJ Open* 2023. DOI:10.9778/cmajo.20220158. Copyright © 2023 The Author(s) or their employer(s). To receive this resource in an accessible format, please contact us at [cmajgroup.cmaj.ca](mailto:cmajgroup.cmaj.ca).

**Figure S6**

*Mean Z-scores for Positive Symptoms Scale–Long Version with 95% Confidence Intervals by Months and Years, Admissions for March, April, May and June 2019, 2020, and 2021*

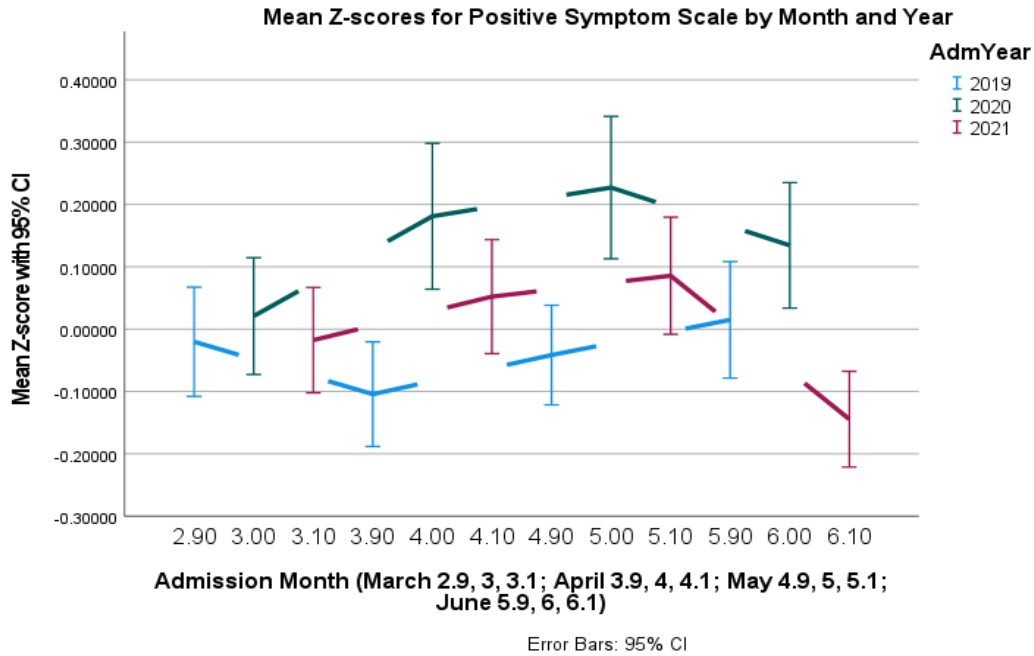



**Figure S7**

*Mean Z-scores for Social Withdrawal Scale with 95% Confidence Intervals by Months and Years, Admissions for March, April, May and June 2019, 2020, and 2021*

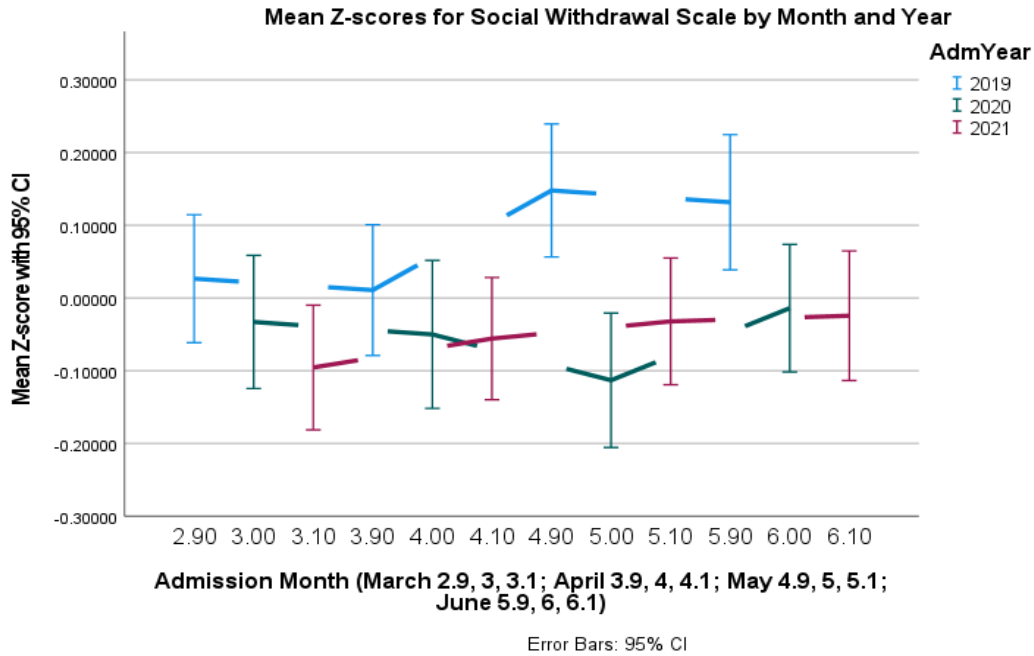

**Figure S8**

*Mean Z-scores for Cognitive Performance Scale with 95% Confidence Intervals by Months and Years, Admissions for March, April, May and June 2019, 2020, and 2021*

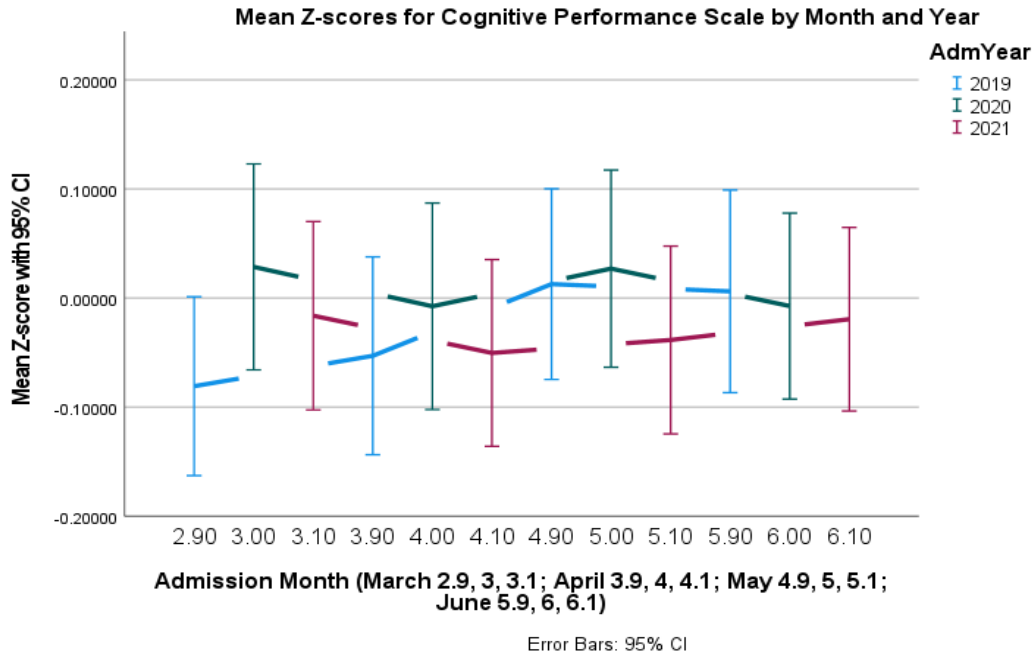

**Figure S9**

*Mean Z-scores for Depression Severity Scale with 95% Confidence Intervals by Months and Years, Admissions for March, April, May and June 2019, 2020, and 2021*

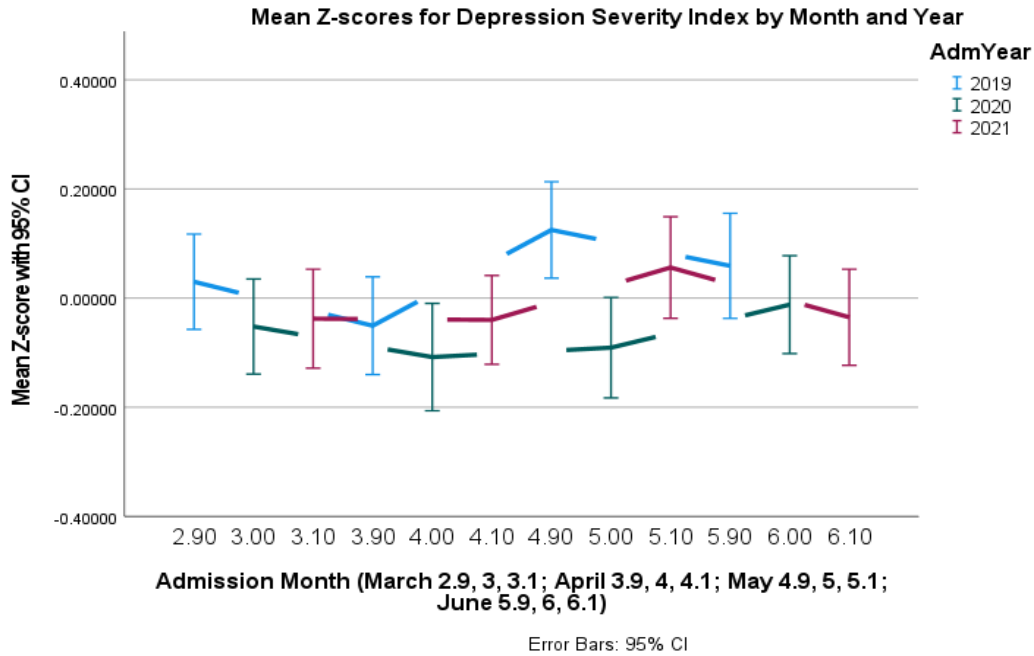

Supplement: open-2022-0158-1-at.pdf [file open-2022-0158-1-at.pdf]
